# Supplementary material for: Transcription factor network analysis based on single cell RNA-seq identifies that Trichostatin-a reverses docetaxel resistance in prostate Cancer
Source: PubMed Central journal article supplement (PMC8653542; doi:10.1186/s12885-021-09048-0), 2021-12-08

Supplementary Figure 1

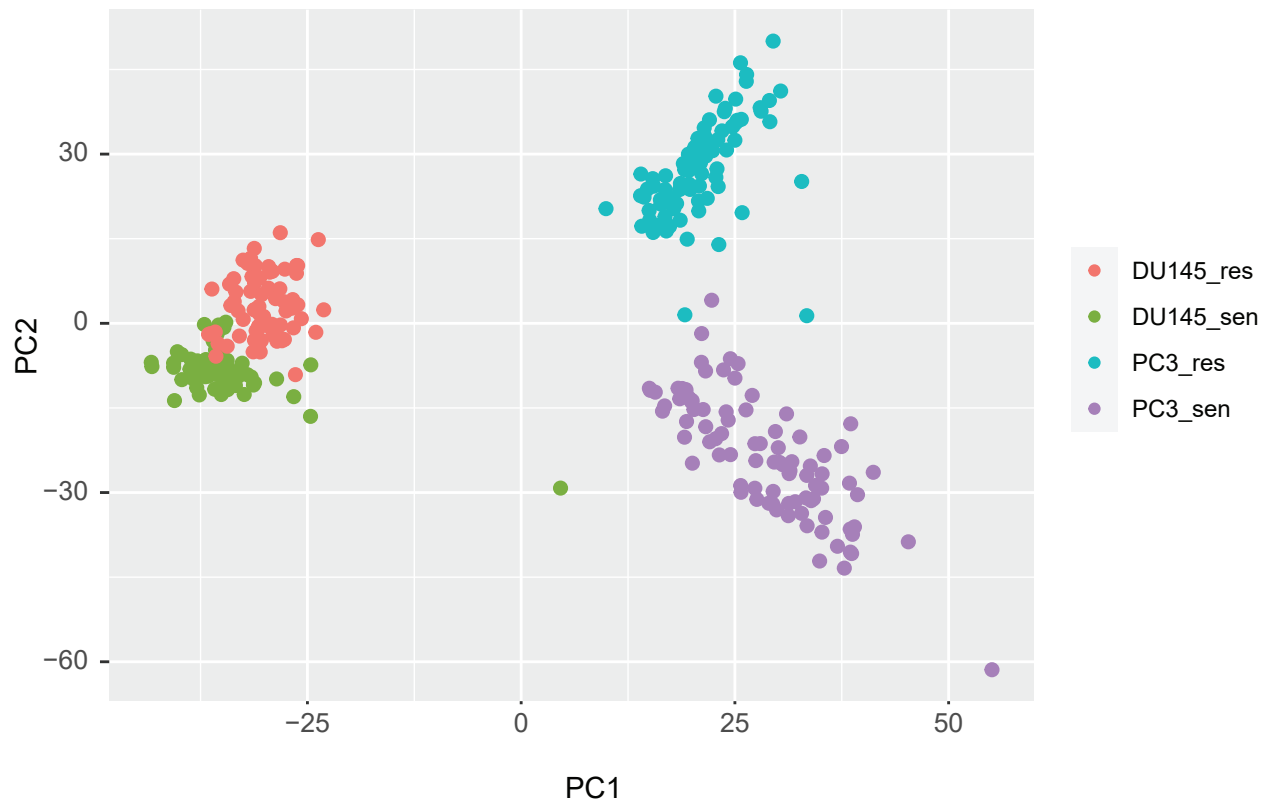

## Supplementary Figure 2

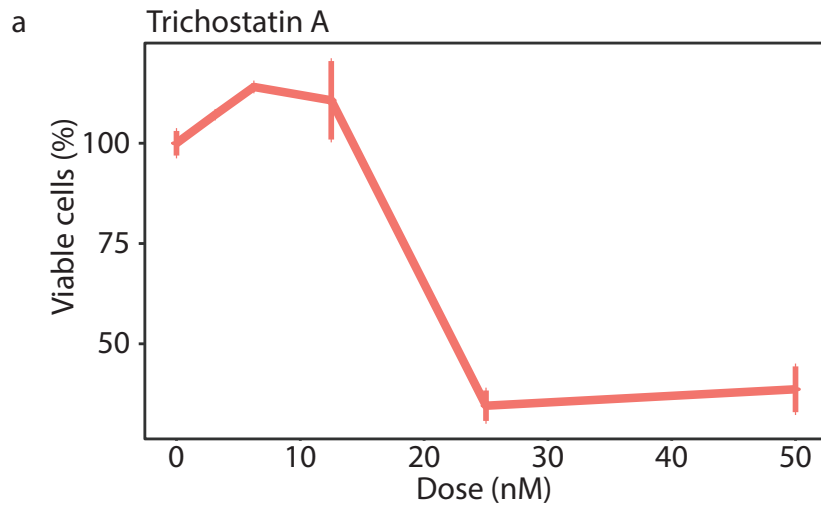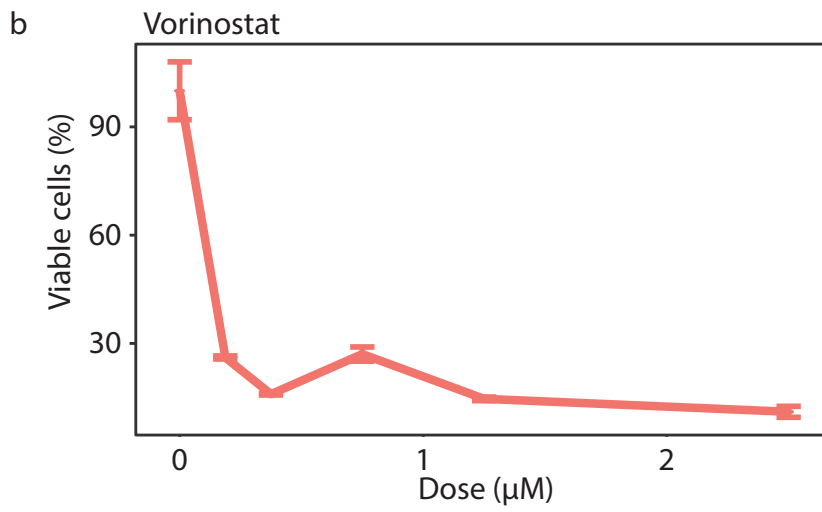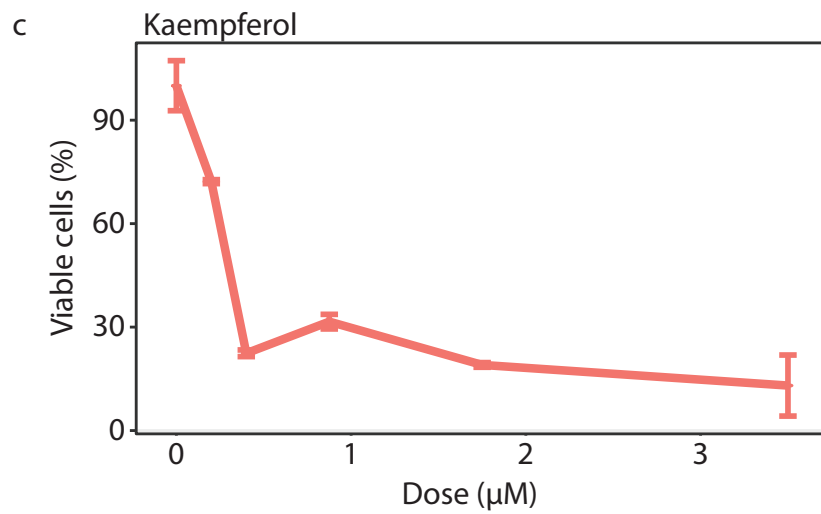

# Supplementary Figure 3

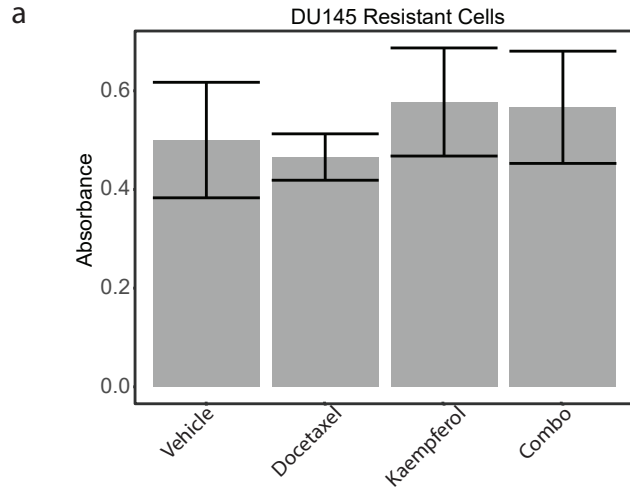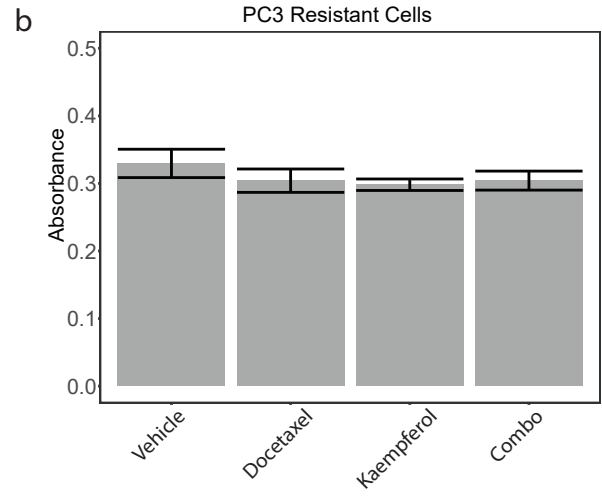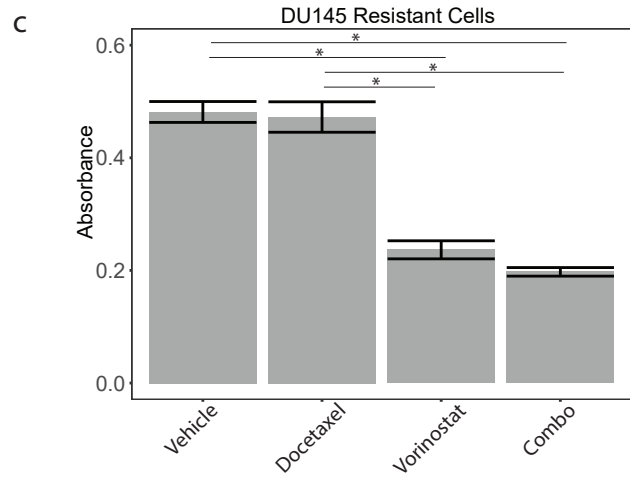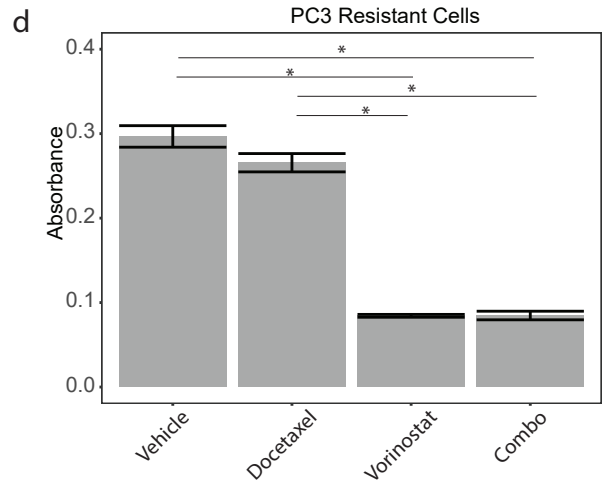

Supplement: 12885_2021_9048_MOESM1_ESM.pdf [file 12885_2021_9048_MOESM1_ESM.pdf]
